# Supplementary material
Source: PubMed Central journal article supplement (PMC5748901)
Supplement: ASN.2017010020SupplementaryData1.pdf [file ASN.2017010020SupplementaryData1.pdf]

**Supplemental Table 1: Outcome measures at baseline, month 2 (if available), and month 4**

| Outcome                                   | Period   | N   | Aerobic Exercise<br>Caloric Restriction <sup>a</sup> | Aerobic Exercise<br>Usual Diet <sup>a</sup> | Usual Activity<br>Caloric Restriction <sup>a</sup> | Usual Activity<br>Usual Diet <sup>a</sup> |
|-------------------------------------------|----------|-----|------------------------------------------------------|---------------------------------------------|----------------------------------------------------|-------------------------------------------|
| F2-isoprostane, ng/ml                     | baseline | 97  | 0.0300 [0.0245, 0.0420]                              | 0.0400 [0.0275, 0.0515]                     | 0.0300 [0.0220, 0.0350]                            | 0.0405 [0.0310, 0.0535]                   |
|                                           | m4       | 90  | 0.0290 [0.0200, 0.0422]                              | 0.0330 [0.0222, 0.0452]                     | 0.0350 [0.0255, 0.0415]                            | 0.0430 [0.0340, 0.0590]                   |
| Serum Albumin, g/dl                       | baseline | 108 | 4.15 [3.95, 4.40]                                    | 4.18 [3.80, 4.30]                           | 4.05 [3.85, 4.09]                                  | 4.15 [3.90, 4.40]                         |
|                                           | m2       | 97  | 4.20 [3.80, 4.50]                                    | 4.00 [3.82, 4.10]                           | 4.15 [3.82, 4.27]                                  | 4.20 [3.90, 4.40]                         |
|                                           | m4       | 91  | 4.25 [3.90, 4.50]                                    | 4.00 [3.80, 4.27]                           | 4.00 [3.77, 4.20]                                  | 4.10 [3.90, 4.20]                         |
| BIA body fat, %                           | baseline | 107 | 34.7 [25.6, 45.7]                                    | 31.9 [28.4, 39.0]                           | 33.0 [28.0, 44.0]                                  | 36.7 [27.5, 42.2]                         |
|                                           | m2       | 98  | 36.4 [27.0, 44.2]                                    | 33.1 [26.8, 36.5]                           | 33.4 [27.9, 42.2]                                  | 35.3 [29.5, 42.4]                         |
|                                           | m4       | 92  | 34.3 [23.8, 43.4]                                    | 33.6 [27.3, 38.0]                           | 31.9 [25.9, 41.7]                                  | 37.1 [29.8, 39.7]                         |
| BMI, kg/m <sup>2</sup>                    | baseline | 111 | 32.8 [30.4, 35.8]                                    | 31.0 [28.0, 36.2]                           | 32.8 [28.7, 37.1]                                  | 35.5 [30.6, 41.5]                         |
|                                           | m2       | 98  | 32.2 [29.9, 35.2]                                    | 29.9 [27.5, 35.5]                           | 32.1 [28.8, 37.1]                                  | 33.6 [30.6, 39.0]                         |
|                                           | m4       | 92  | 31.6 [29.1, 34.1]                                    | 31.0 [27.9, 35.8]                           | 31.9 [28.9, 38.1]                                  | 33.3 [30.0, 40.0]                         |
| DEXA body fat pct                         | baseline | 99  | 41.2 [35.0, 45.5]                                    | 41.6 [36.7, 45.4]                           | 42.4 [33.4, 46.4]                                  | 40.5 [32.5, 43.6]                         |
|                                           | m4       | 77  | 40.8 [35.3, 44.4]                                    | 42.7 [38.7, 45.2]                           | 39.7 [31.7, 44.0]                                  | 39.2 [32.6, 43.5]                         |
| BUN, mg/dl                                | baseline | 108 | 32.1 [22.0, 40.6]                                    | 28.4 [22.6, 39.6]                           | 25.2 [21.5, 34.0]                                  | 30.3 [22.3, 37.0]                         |
|                                           | m2       | 97  | 29.9 [21.3, 39.7]                                    | 30.2 [22.8, 38.9]                           | 28.1 [22.0, 35.9]                                  | 29.1 [24.6, 36.0]                         |
|                                           | m4       | 91  | 29.3 [19.4, 39.5]                                    | 33.0 [22.5, 38.9]                           | 26.4 [21.8, 34.5]                                  | 30.3 [22.5, 35.6]                         |
| Co2mmoll/lt                               | baseline | 108 | 20.4 [19.6, 21.4]                                    | 20.2 [18.1, 22.1]                           | 20.5 [18.8, 22.7]                                  | 21.0 [18.7, 23.9]                         |
|                                           | m2       | 97  | 21.4 [19.4, 22.6]                                    | 19.6 [17.8, 21.4]                           | 19.8 [17.4, 22.3]                                  | 21.8 [18.0, 22.3]                         |
|                                           | m4       | 91  | 20.9 [19.7, 22.2]                                    | 20.1 [17.9, 22.1]                           | 20.4 [19.3, 23.6]                                  | 19.4 [18.5, 23.3]                         |
| Diastolic BP, mmHg                        | baseline | 111 | 75.0 [68.0, 84.2]                                    | 78.0 [71.5, 86.5]                           | 78.0 [73.5, 84.0]                                  | 76.5 [72.0, 83.0]                         |
|                                           | m2       | 98  | 76.5 [72.0, 83.8]                                    | 80.0 [78.0, 85.0]                           | 78.0 [73.0, 83.5]                                  | 78.0 [73.0, 80.0]                         |
|                                           | m4       | 92  | 74.0 [70.0, 82.5]                                    | 80.5 [72.2, 84.8]                           | 76.0 [69.0, 84.0]                                  | 77.0 [72.0, 81.0]                         |
| eGFR cystatin, ml/min/1.73 m <sup>2</sup> | baseline | 107 | 38.0 [28.1, 54.9]                                    | 41.8 [27.3, 47.9]                           | 39.0 [32.4, 51.9]                                  | 33.2 [27.4, 46.5]                         |
|                                           | m4       | 91  | 37.2 [28.3, 61.7]                                    | 41.8 [27.6, 47.4]                           | 39.7 [23.2, 51.9]                                  | 32.2 [27.7, 45.8]                         |
| Glucose, mg/dl                            | baseline | 108 | 101.5 [96.0, 111.0]                                  | 100.8 [95.6, 122.1]                         | 96.8 [88.8, 109.9]                                 | 104.0 [94.5, 118.5]                       |
|                                           | m2       | 97  | 95.0 [91.0, 108.5]                                   | 105.0 [100.2, 116.0]                        | 97.5 [83.5, 111.0]                                 | 107.0 [94.0, 125.0]                       |
|                                           | m4       | 91  | 94.5 [91.0, 102.8]                                   | 107.5 [100.2, 111.2]                        | 95.5 [86.8, 106.0]                                 | 102.0 [88.0, 121.0]                       |
| HGBA1c, %                                 | baseline | 90  | 5.60 [5.32, 5.77]                                    | 5.60 [5.50, 6.18]                           | 5.60 [5.30, 6.00]                                  | 5.70 [5.50, 6.45]                         |
|                                           | m4       | 79  | 5.55 [5.20, 5.82]                                    | 5.70 [5.50, 6.10]                           | 5.60 [5.30, 5.80]                                  | 5.80 [5.45, 6.20]                         |
| IL-10, pg/ml                              | baseline | 108 | 0.765 [0.185, 1.345]                                 | 0.696 [0.001, 2.075]                        | 0.493 [0.001, 1.580]                               | 0.715 [0.196, 2.860]                      |
|                                           | m2       | 97  | 0.150 [0.001, 1.000]                                 | 0.380 [0.001, 1.377]                        | 0.001 [0.001, 1.203]                               | 1.000 [0.001, 2.140]                      |
|                                           | m4       | 91  | 0.001 [0.001, 1.215]                                 | 0.330 [0.001, 1.873]                        | 0.410 [0.001, 1.865]                               | 0.370 [0.001, 3.490]                      |
| IL-6, pg/ml                               | baseline | 108 | 1.315 [0.505, 2.700]                                 | 1.375 [0.143, 3.951]                        | 1.657 [0.565, 2.228]                               | 1.290 [0.680, 3.915]                      |
|                                           | m2       | 97  | 1.030 [0.001, 2.035]                                 | 0.680 [0.138, 2.007]                        | 0.855 [0.450, 1.820]                               | 1.460 [0.600, 4.610]                      |
|                                           | m4       | 91  | 0.9650 [0.3550, 1.5675]                              | 0.7750 [0.0508, 2.2125]                     | 1.4950 [0.7300, 2.9850]                            | 1.9900 [0.6500, 4.1600]                   |
| Isosfuran, ng/ml                          | baseline | 97  | 0.0460 [0.0315, 0.0625]                              | 0.0530 [0.0395, 0.0740]                     | 0.0500 [0.0330, 0.0560]                            | 0.0515 [0.0425, 0.0688]                   |
|                                           | m4       | 90  | 0.0440 [0.0273, 0.0680]                              | 0.0490 [0.0318, 0.0700]                     | 0.0500 [0.0275, 0.0605]                            | 0.0520 [0.0420, 0.0660]                   |
| Systolic BP, mmHg                         | baseline | 111 | 128 [109, 141]                                       | 134 [114, 144]                              | 132 [118, 141]                                     | 136 [118, 142]                            |
|                                           | m2       | 98  | 119 [116, 132]                                       | 130 [116, 138]                              | 128 [116, 140]                                     | 132 [117, 143]                            |
|                                           | m4       | 92  | 118 [115, 132]                                       | 126 [117, 136]                              | 122 [112, 134]                                     | 127 [121, 130]                            |
| Urine creatinine, mg/dl                   | baseline | 107 | 86.5 [68.2, 124.8]                                   | 91.0 [66.5, 129.7]                          | 109.4 [80.2, 138.9]                                | 106.4 [66.5, 152.5]                       |
|                                           | m4       | 91  | 98.4 [64.3, 118.5]                                   | 87.6 [70.9, 123.3]                          | 96.7 [73.0, 144.5]                                 | 127.4 [61.1, 163.1]                       |
| VO2 peak, ml/(kg.min)                     | baseline | 108 | 19.4 [16.2, 24.4]                                    | 19.8 [16.8, 22.4]                           | 19.7 [15.4, 22.2]                                  | 19.3 [16.3, 22.5]                         |
|                                           | m4       | 86  | 22.3 [18.7, 25.8]                                    | 20.6 [19.1, 22.6]                           | 18.6 [14.9, 23.6]                                  | 19.3 [16.6, 22.0]                         |
| Waist Hip Ratio                           | baseline | 109 | 0.960 [0.900, 1.000]                                 | 0.925 [0.863, 1.010]                        | 0.970 [0.898, 1.002]                               | 0.960 [0.890, 1.020]                      |
|                                           | m2       | 98  | 0.955 [0.878, 1.013]                                 | 0.950 [0.872, 1.000]                        | 0.930 [0.900, 0.975]                               | 0.960 [0.900, 1.020]                      |
|                                           | m4       | 91  | 0.955 [0.880, 0.990]                                 | 0.960 [0.895, 0.980]                        | 0.945 [0.885, 0.980]                               | 0.950 [0.910, 1.030]                      |
| Weight, kg                                | baseline | 111 | 99.8 [85.5, 107.0]                                   | 90.0 [83.2, 106.5]                          | 97.7 [85.7, 111.4]                                 | 105.0 [86.7, 131.6]                       |
|                                           | m2       | 98  | 98.4 [81.8, 104.5]                                   | 88.0 [79.1, 99.3]                           | 97.3 [81.6, 110.3]                                 | 100.0 [86.7, 131.0]                       |
|                                           | m4       | 92  | 97.6 [78.5, 104.6]                                   | 89.3 [80.7, 100.6]                          | 99.1 [80.0, 111.3]                                 | 96.8 [84.0, 127.3]                        |

<sup>a</sup> Table reports median [1<sup>st</sup> quartile, 3<sup>rd</sup> quartile].

**Supplemental Table 2. The effects of treatment, exercise and diets at month 4\***

| <b>Outcome</b>             | <b>Mo 2</b> | <b>Mo 4</b> | <b>Treatment Effect</b> | <b>Exercise Effect</b> | <b>Diet Effect</b> | <b>Interaction Effect</b> |
|----------------------------|-------------|-------------|-------------------------|------------------------|--------------------|---------------------------|
|                            | <b>N</b>    |             | <b>p-value</b>          |                        |                    |                           |
| <b>BMI</b>                 | 98          | 92          | <b>0.025</b>            | 0.386                  | <b>0.009</b>       | 0.200                     |
| <b>Weight</b>              | 98          | 92          | <b>0.016</b>            | 0.541                  | <b>0.004</b>       | 0.217                     |
| <b>DEXA body fat pct</b>   | 0           | 76          | <b>0.015</b>            | 0.276                  | <b>0.021</b>       | 0.744                     |
| <b>Waist Hip Ratio</b>     | 97          | 90          | 0.087                   | 0.718                  | <b>0.029</b>       | 0.373                     |
| <b>VO<sub>2</sub> Peak</b> | 0           | 86          | 0.429                   | 0.368                  | 0.564              | 0.622                     |
| <b>Systolic BP</b>         | 98          | 92          | 0.978                   | 0.919                  | 0.978              | 0.887                     |
| <b>Diastolic BP</b>        | 98          | 92          | 0.841                   | 0.700                  | 0.740              | 0.477                     |
| <b>F2-isoprostane</b>      | 0           | 90          | <b>0.012</b>            | 0.050                  | <b>0.036</b>       | 0.322                     |
| <b>Isofuran</b>            | 0           | 90          | 0.766                   | 0.896                  | 0.578              | 0.663                     |
| <b>IL-10</b>               | 96          | 90          | 0.246                   | 0.152                  | 0.443              | 0.266                     |
| <b>IL-6</b>                | 96          | 90          | <b>0.009</b>            | <b>0.004</b>           | <b>0.028</b>       | <b>0.011</b>              |
| <b>eGFR cystatin</b>       | 0           | 89          | 0.932                   | 0.860                  | 0.883              | 0.730                     |

\* When month 4 and month 2 outcome measures were available, we fit a linear mixed model with a time component, subject-specific random intercepts, and the following covariates: baseline outcome values, site, diabetic status, age, gender, diet, exercise and crossproduct of diet and exercise. When month 2 outcome measures were not available, we fit a linear regression model with the same predictors (minus the time component and subject specific random intercepts). All participant data was included.
